# Supplementary material for: High-throughput quantitation of inorganic nanoparticle biodistribution at the single-cell level using mass cytometry
Source: PubMed Central journal article supplement (PMC5247578; doi:10.1038/ncomms14069), 2017-01-17
Supplement: ncomms14069-s1.pdf [file ncomms14069-s1.pdf]

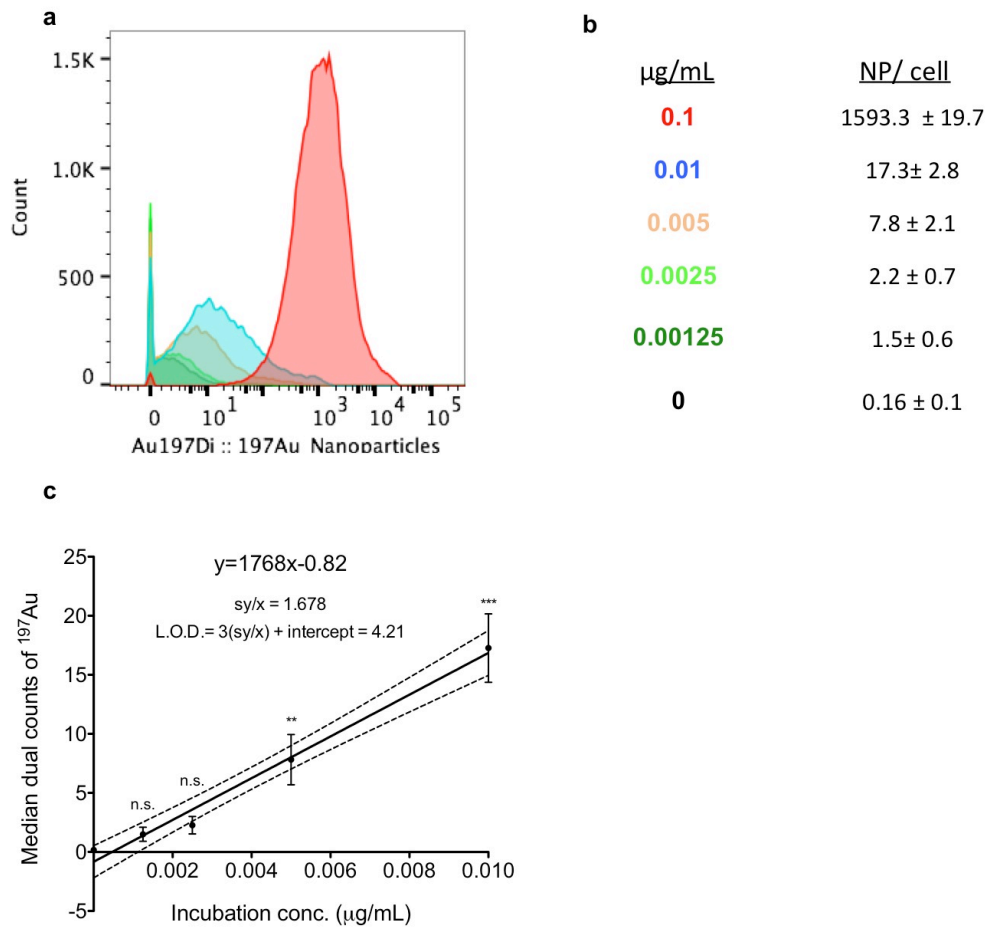

**Supplementary Figure 1. CyTOF can detect as few as ~10 gold nanoparticles (~3 nm in diameter) in macrophages.** RAW blue macrophages were treated with titrated concentrations of MUS/OT-BODIPY NPs: 0.1, 0.01 0.005 0.0025, or 0.00125 ug/ml for 6 hours at 37°C. (a) Representative CyTOF gold histograms in RAW cells treated with various concentrations of MUS/OT-BODIPY AuNPs. (b) Median number of NPs per cell determined from CyTOF data. (c) Regression with error shown by dashed lines ( $n=3$  samples per concentration). \*  $P < 0.05$ ; \*\*\*  $P < 0.0001$  by Bonferroni's Multiple Comparison Test compared to zero NPs per cell. Data points show mean  $\pm$  s.d.

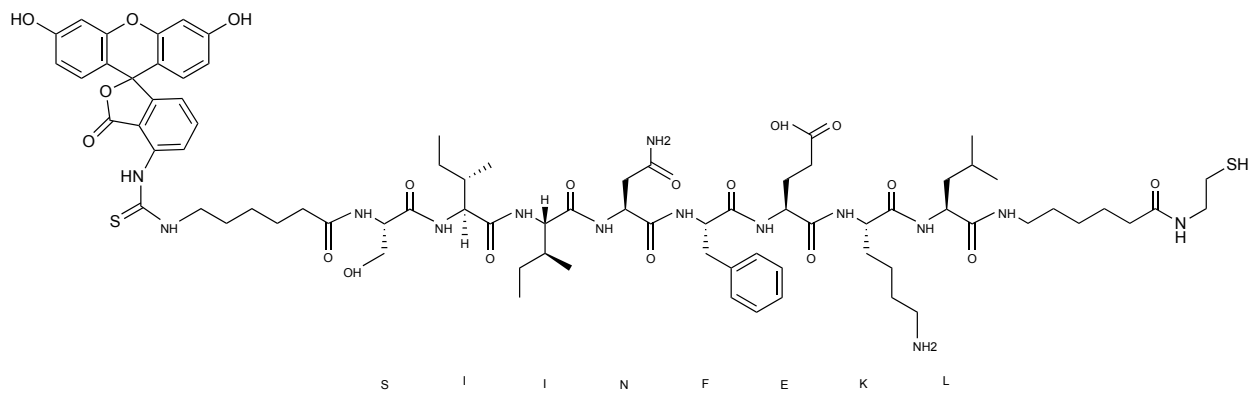

**Supplementary Figure 2. Chemical structure of FITC-SIINFEKL-thiol peptide construct.** This peptide was synthesized by LifeTein (Sumerset, NJ).

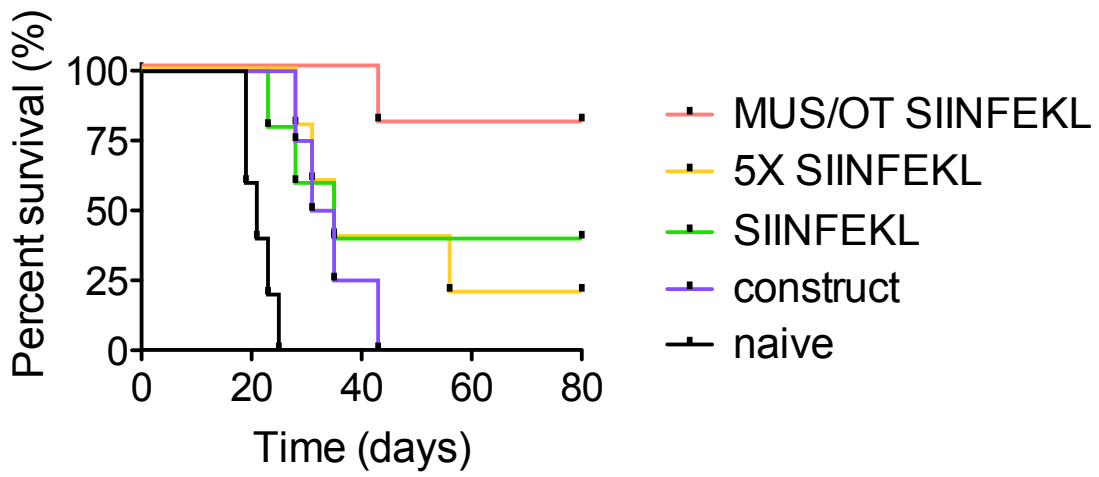

**Supplementary Figure 3. Survival curve of tumor challenged mice.** A quarter million of B16-OVA cells were inoculated on the flank of mice subcutaneously 150 days post vaccination.

|        | Core Diam. (nm) | $\zeta$ -potential (mV) |
|--------|-----------------|-------------------------|
| MPSA   | 3.79±1.1        | -32.6± 2.5              |
| MUS/OT | 2.78±0.9        | -28.9± 2.2              |
| PEG    | 2.61±1.0        | -23.7± 0.4              |

**Supplementary Table 1. Characterization of nanoparticles coated with various ligands.** Size distributions and zeta potentials of MPSA, MUS/OT, and PEG NPs determined from TEM and Zetasizer NanoZS, respectively.
